# Supplementary material for: Controlled Atmosphere Storage Alleviates Hass Avocado Black Spot Disorder
Source: MDPI journal article supplement (doi:10.3390/horticulturae8050369), 2022-04-22
Supplement: s1 [file s1]

**(a)** Early Harvest - 40 d

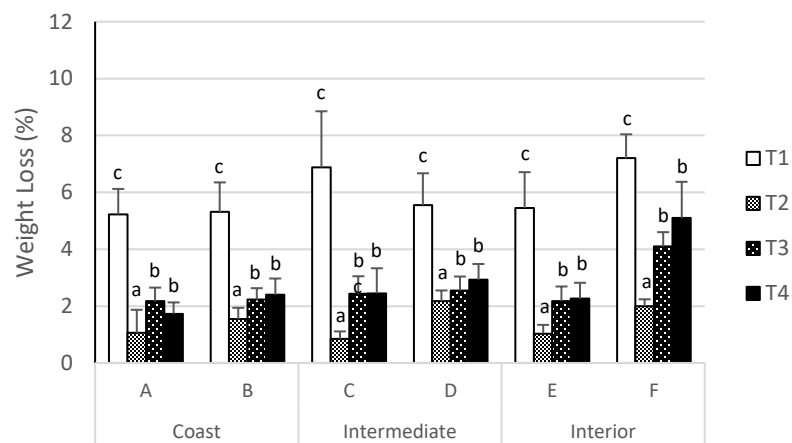

**(b)** Middle Harvest - 40 d

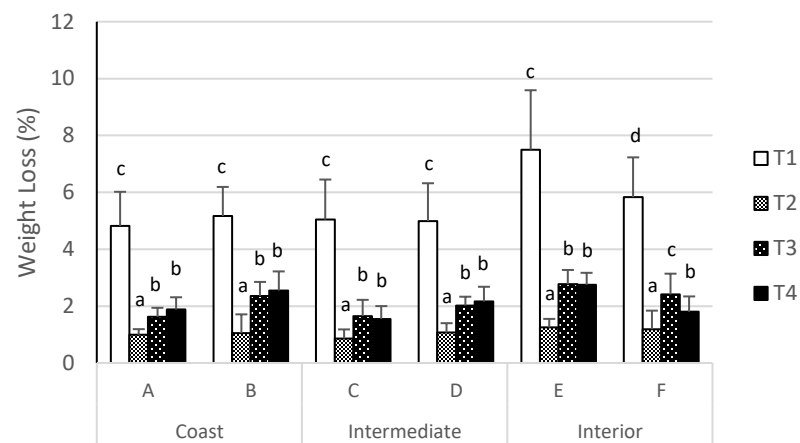

**(c)** Early Harvest - RTE

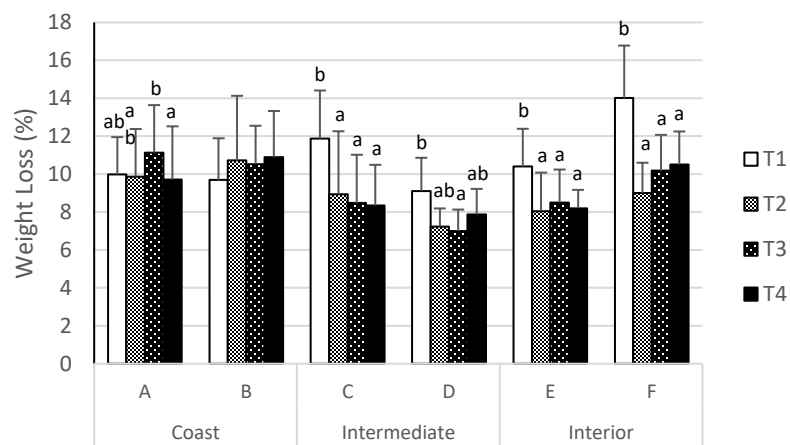

**(d)** Middle Harvest - RTE

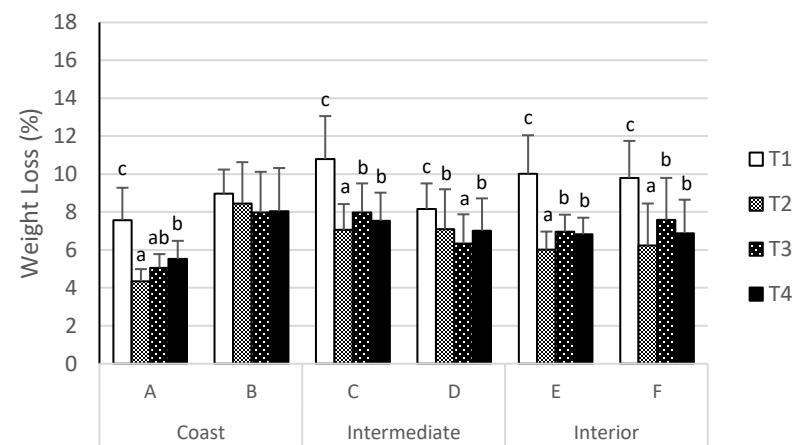

**Figure S1.** Weight loss (%) of avocado fruit during different postharvest treatments at the end of cold storage (a and b) and at ready-to-eat (RTE) (c and d) from early and middle harvest. T1: 40 d in regular air (RA) at 5 °C; T2: 40 d in controlled atmosphere (CA) 4 kPa O<sub>2</sub> and 6 kPa CO<sub>2</sub> at 5 °C; T3: 10 d in RA at 5 °C plus 30 d in CA 4 kPa O<sub>2</sub> and 6 kPa CO<sub>2</sub> at 5 °C; and, T4: 5μM MeJA plus 10 d in RA at 5 °C plus 30 d in CA 4 kPa O<sub>2</sub> and 6 kPa CO<sub>2</sub> at 5 °C.
